# Supplementary material
Source: PubMed Central journal article supplement (PMC3357942)
Supplement: supp_blood-2010-10-314278_Document1.pdf [file supp_blood-2010-10-314278_Document1.pdf]

### **Figure S1. IMiD compounds inhibit cell cycle in MM cells**

MM.1S cells ( $1 \times 10^6$ ) were incubated with pomalidomide or lenalidomide for 3 days. DMSO 0.01% was used as control treatment. Cells were stained with PI (20  $\mu\text{g/mL}$ ). Cell cycle analysis was performed by flow cytometry. Treatment with pomalidomide or lenalidomide induced a dose-dependent accumulation of cells in G0/G1 phase ( $\square$  bars) and decreased the number of cells in S ( $\blacksquare$  bars) and G2/M phases ( $\boxtimes$  bars).

### **Figure S2. Pomalidomide has no effects on MM cell apoptosis**

MM.1S cells ( $1 \times 10^6$ ) were incubated with pomalidomide or DMSO 0.01% for 1, 2 or 3 days. Flow cytometry was used to analyze the percentage of apoptotic cells, detected by Annexin V binding/ PI staining.

Figure S1

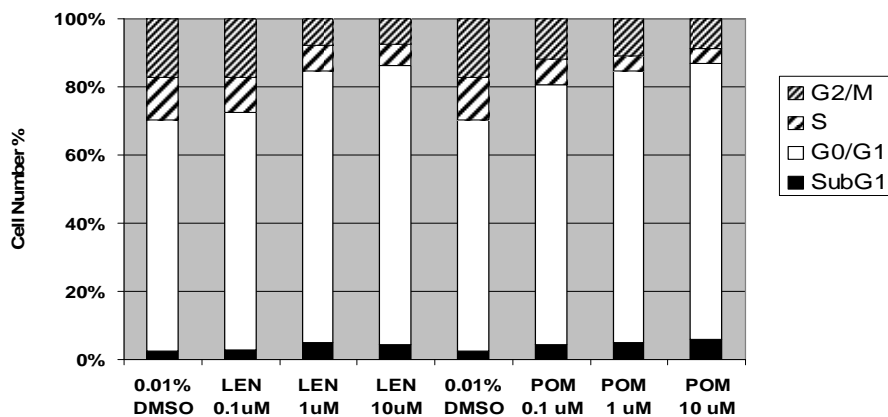

Figure S2

|     |                | DMSO       | Pomalidomide |            |            |            |            |
|-----|----------------|------------|--------------|------------|------------|------------|------------|
|     |                |            | 0.01uM       | 0.1uM      | 1uM        | 10uM       | 50uM       |
| 24H | PI+/Annexin V- | 2.34±0.25  | 3.56±0.69    | 2.61±0.40  | 4.21±0.05  | 2.79±0.16  | 2.81±0.75  |
|     | PI+/Annexin V+ | 1.82±0.21  | 1.48±0.44    | 2.21±0.30  | 0.84±0.13  | 2.04±0.20  | 1.81±0.12  |
|     | PI-/Annexin V- | 90.61±0.39 | 91.06±0.59   | 89.80±0.79 | 91.83±0.82 | 90.48±0.98 | 90.84±0    |
|     | PI-/Annexin V+ | 5.25±0.45  | 3.91±0.83    | 5.39±0.89  | 3.13±0.74  | 4.70±0.94  | 4.94±0.07  |
| 48H | PI+/Annexin V- | 3.67±0.01  | 3.49±0.42    | 2.95±0.74  | 2.46±0.06  | 2.97±0.25  | 3.35±0.35  |
|     | PI+/Annexin V+ | 1.06±0.03  | 2.02±0.02    | 2.21±0.36  | 3.02±0.14  | 2.80±0.06  | 2.51±0.06  |
|     | PI-/Annexin V- | 91.47±0.16 | 89.11±0.34   | 89.00±0.21 | 87.86±0.01 | 87.91±0.04 | 87.71±0.02 |
|     | PI-/Annexin V+ | 3.80±0.11  | 5.39±0.78    | 5.86±0.59  | 6.66±0.18  | 6.34±0.15  | 6.44±0.27  |
| 72H | PI+/Annexin V- | 2.67±0.48  | 4.48±0.62    | 5.15±0.13  | 5.62±0.22  | 6.58±0.20  | 6.12±0.09  |
|     | PI+/Annexin V+ | 1.40±0.19  | 1.85±0.38    | 1.84±0.06  | 1.87±0.13  | 2.40±0.17  | 2.84±0.08  |
|     | PI-/Annexin V- | 90.22±0.59 | 89.24±0.33   | 88.21±0.08 | 86.89±0.49 | 84.24±0.16 | 83.68±0.10 |
|     | PI-/Annexin V+ | 5.72±0.30  | 4.44±0.57    | 4.81±0.02  | 5.63±0.14  | 6.78±0.19  | 7.37±0.11  |
